# Supplementary material for: Micelles Mediated Zone Fluidics Method for Hydrazine Determination in Environmental Samples
Source: MDPI journal article supplement (doi:10.3390/molecules25010174), 2019-12-31
Supplement: s1 [file s1]

# Micelles Mediated Zone Fluidics Method for Hydrazine Determination in Environmental Samples

Theano D. Karakosta <sup>1</sup>, Christophoros Christophoridis <sup>2</sup>, Konstantinos Fytianos <sup>2</sup> and Paraskevas D. Tzanavaras <sup>3,\*</sup>

<sup>1</sup> LifeLabs Medical Laboratories, Toronto, ON M9W6J6, Canada; karakostatheano@hotmail.com

<sup>2</sup> Environmental Pollution Control Laboratory, Department of Chemistry, Aristotle University of Thessaloniki, 54124 Thessaloniki, Greece; cchrist@chem.auth.gr (C.C); fyti@chem.auth.gr (K.F.)

<sup>3</sup> Laboratory of Analytical Chemistry, Department of Chemistry, Aristotle University of Thessaloniki, 54124 Thessaloniki, Greece

\* Correspondence: ptzanava@chem.auth.gr; Tel.: +30-2310997721, Fax: +30-2310997719

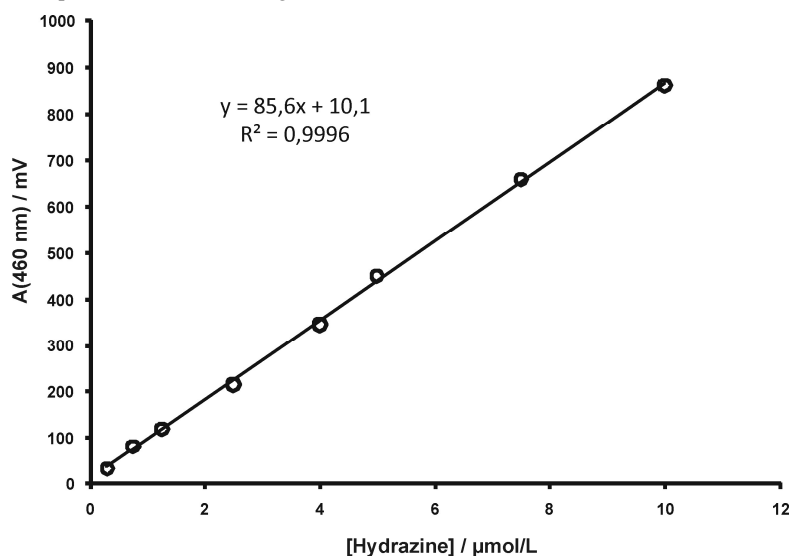

Figure 1S. Graphical depiction of the aqueous calibration curve.

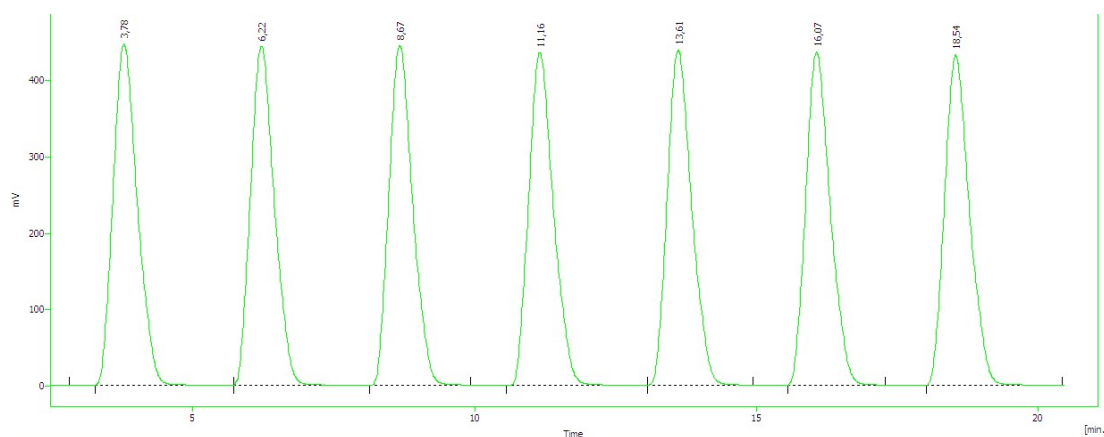

Figure 2S. Representative ZF peaks.

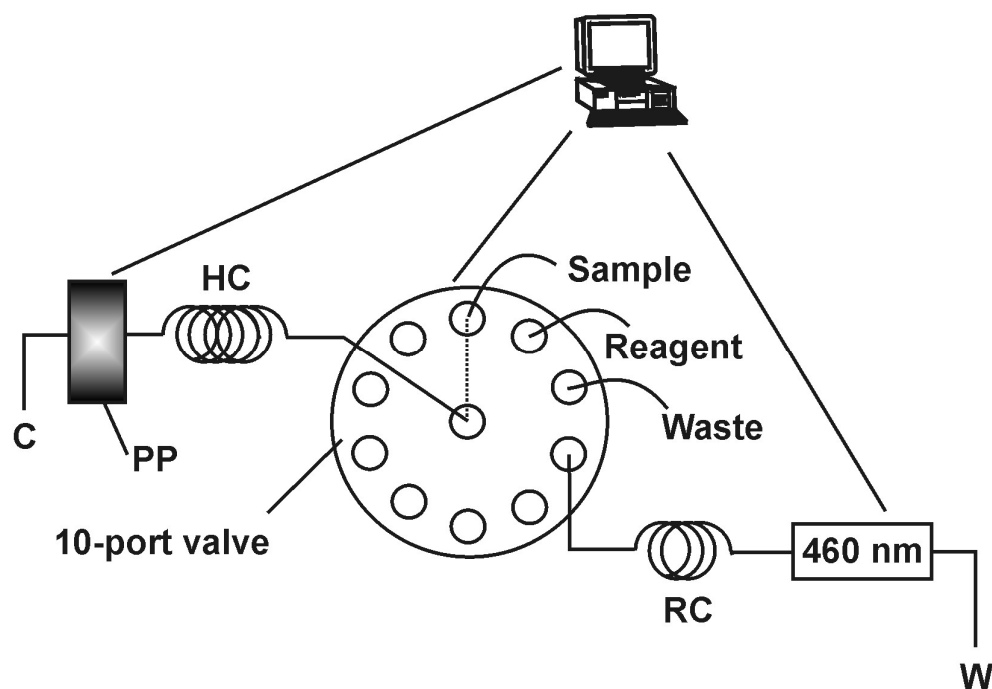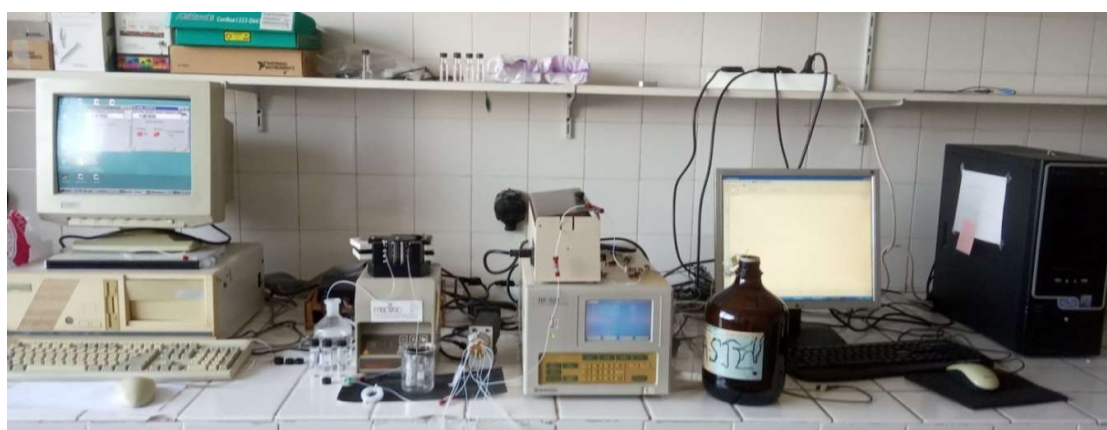

**Figure 3S.** Schematic depiction and image of the ZF configuration (for experimental details on the instrumentation see the experimental section 3.2).

**Table 1S.** Overview of automated flow methods for the determination of hydrazine.

| Flow Technique | Method principle                                                                                                            | LOD ( $\mu\text{g L}^{-1}$ ) | Sampling Rate ( $\text{h}^{-1}$ ) | Application     | Ref        |
|----------------|-----------------------------------------------------------------------------------------------------------------------------|------------------------------|-----------------------------------|-----------------|------------|
| ZF             | Reaction with OPA after on-line SPE and fluorimetric detection (318/376 nm)                                                 | 0.9                          | 12                                | Pharmaceutics   | [6]        |
| FI             | Amperometric sensor based on electrocatalytic oxidation at an Au nanoparticle-modified pretreated graphite pencil electrode | 0.07                         | 120                               | Water samples   | [7]        |
| FI             | Amperometric sensor based on electrocatalytic oxidation at pyrocatechol violet modified pencil graphite electrode           | 2.9                          | —                                 | Water samples   | [8]        |
| FI             | Electrochemical detection with a coplanar boron doped diamond microband electrode modified with Pt nano-particles           | 2.3                          | —                                 | Pharmaceutics   | [9]        |
| FI             | Electrochemical detection with a Quercetin tethered pristine-multiwalled carbon nanotube modified glassy carbon electrode   | 4.9                          | 10                                | Cigarette smoke | [10]       |
| FI             | Voltammetric detection with a nanostructured AuCu <sub>3</sub> alloy electrode                                              | 1.4                          | 45                                | Water samples   | [11]       |
| FI             | Reaction with p-DAB in highly acidic medium and spectrophotometric detection (460 nm)                                       | 2<br>(LOQ)                   | 24                                | Water samples   | [12]       |
| FI             | Amperometric determination using a surface modified nickel hexacyanoferrate graphite electrode                              | 36                           | 54                                | Water samples   | [13]       |
| FI             | Indirect AAS using PbO <sub>2</sub> as solid phase microcolumn packing.                                                     | 101                          | 80                                | Water samples   | [14]       |
| FI             | Amperometric detection by cyclic voltammetry using ruthenium modified glassy carbon electrodes                              | 306                          | —                                 | N/A             | [15]       |
| FI             | Electrocatalytic determination using copper-palladium alloy nanoparticle plated screen-printed carbon electrodes            | 9.7                          | 180                               | Cigarette smoke | [16]       |
| FI             | Elelectrocatalytic determination using barrel plating rhodium disposable electrodes                                         | 2.5                          | 45                                | Water samples   | [17]       |
| FI             | Post-chemiluminescence arising from the permanganate-luminol reaction induced by hydrazine                                  | 30                           | —                                 | N/A             | [18]       |
| FI             | Inhibition of the pyrogallol red-iodate reaction (470 nm)                                                                   | 30                           | 15                                | Water samples   | [19]       |
| ZF             | Reaction with p-DAB in micellar medium and UV-vis detection (460 nm)                                                        | 3.6                          | 15                                | Water samples   | This study |

ZF = zone fluidics; OPA = *o*-phthalaldehyde; SPE = solid phase extraction; FI = flow injection; N/A = no application in real samples.
